# Supplementary material for: Causal Effect of Chondroitin, Glucosamine, Vitamin, and Mineral Intake on Kidney Function: A Mendelian Randomization Study
Source: MDPI journal article supplement (doi:10.3390/nu15153318), 2023-07-26
Supplement: s1 [file s1]

## **Supplemental Materials Table of Contents**

**Supplemental Table S1.** Genetic instruments of chondroitin, glucosamine, and vitamin and/or mineral supplement intake used for the Mendelian randomization analysis

**Supplemental Table S2.** Potential confounders of SNPs for chondroitin intake under the condition of  $P < 5 \times 10^{-8}$  in the PhenoScanner

**Supplemental Table S3.** Pleiotropy-robust MR results for dietary supplement intake and kidney function

**Supplemental Table S4.** Sensitivity analyses of chondroitin intake and kidney function after exclusion of SNPs associated with potential confounders identified in PhenoScanner

**Supplemental References**

**Supplemental Table S1. Genetic instruments of chondroitin, glucosamine, and vitamin/mineral supplement intake used for the Mendelian randomization analyses**

| SNP                | CHR | POS       | Effect allele | Other allele | Beta   | SE    | P-value  |
|--------------------|-----|-----------|---------------|--------------|--------|-------|----------|
| <b>Chondroitin</b> |     |           |               |              |        |       |          |
| rs10238899         | 7   | 153492868 | C             | T            | -0.128 | 0.001 | 2.81E-08 |
| rs10246938         | 7   | 153466423 | T             | A            | -0.129 | 0.001 | 1.31E-08 |
| rs10247195         | 7   | 153466623 | G             | A            | -0.129 | 0.001 | 1.34E-08 |
| rs10263816         | 7   | 153470742 | G             | A            | -0.129 | 0.001 | 1.28E-08 |
| rs10268402         | 7   | 153485627 | C             | T            | -0.125 | 0.001 | 3.73E-08 |
| rs10282264         | 7   | 153492809 | T             | C            | -0.125 | 0.001 | 3.97E-08 |
| rs11240229         | 1   | 204576522 | T             | C            | 0.163  | 0.001 | 5.55E-09 |
| rs11584700         | 1   | 204576983 | G             | A            | 0.163  | 0.001 | 5.23E-09 |
| rs11588857         | 1   | 204587047 | A             | G            | 0.164  | 0.001 | 4.16E-09 |
| rs12040459         | 1   | 204564558 | A             | G            | 0.157  | 0.001 | 2.71E-08 |
| rs12040520         | 1   | 204564762 | A             | G            | 0.153  | 0.001 | 4.31E-08 |
| rs12044599         | 1   | 204564714 | G             | A            | 0.153  | 0.001 | 4.18E-08 |
| rs12046747         | 1   | 204593696 | A             | G            | 0.154  | 0.001 | 2.02E-08 |
| rs16853666         | 1   | 204403856 | C             | T            | 0.154  | 0.001 | 3.30E-08 |
| rs16854023         | 1   | 204551830 | C             | T            | 0.170  | 0.001 | 5.47E-09 |
| rs2098112          | 7   | 153487944 | A             | G            | -0.124 | 0.001 | 4.19E-08 |
| rs2159462          | 7   | 153478989 | A             | G            | -0.127 | 0.001 | 2.49E-08 |
| rs2533123          | 7   | 153483021 | G             | A            | -0.125 | 0.001 | 3.61E-08 |
| rs2533125          | 7   | 153473188 | G             | A            | -0.128 | 0.001 | 1.81E-08 |
| rs2533126          | 7   | 153473086 | A             | G            | -0.128 | 0.001 | 1.81E-08 |
| rs2533128          | 7   | 153471543 | G             | A            | -0.127 | 0.001 | 2.07E-08 |
| rs2533133          | 7   | 153466068 | A             | G            | -0.129 | 0.001 | 1.47E-08 |
| rs2533137          | 7   | 153465680 | C             | G            | -0.128 | 0.001 | 1.74E-08 |
| rs2533145          | 7   | 153463438 | G             | T            | -0.129 | 0.001 | 1.29E-08 |
| rs2533148          | 7   | 153462806 | C             | T            | -0.130 | 0.001 | 1.11E-08 |
| rs2533196          | 7   | 153489530 | A             | G            | -0.128 | 0.001 | 2.85E-08 |
| rs2533273          | 7   | 153485282 | A             | C            | -0.131 | 0.001 | 9.57E-09 |
| rs2538462          | 7   | 153497853 | C             | T            | -0.137 | 0.001 | 3.73E-08 |
| rs2622103          | 7   | 153496171 | A             | G            | -0.138 | 0.001 | 1.28E-08 |
| rs2622166          | 7   | 153486905 | A             | G            | -0.125 | 0.001 | 4.10E-08 |
| rs2622170          | 7   | 153486033 | A             | T            | -0.125 | 0.001 | 3.83E-08 |
| rs2622171          | 7   | 153485893 | G             | A            | -0.126 | 0.001 | 3.20E-08 |
| rs2622185          | 7   | 153472469 | G             | A            | -0.129 | 0.001 | 1.33E-08 |
| rs2622217          | 7   | 153464429 | C             | G            | -0.127 | 0.001 | 2.05E-08 |
| rs2622225          | 7   | 153492123 | G             | A            | -0.125 | 0.001 | 4.02E-08 |
| rs2622226          | 7   | 153491516 | G             | A            | -0.125 | 0.001 | 3.55E-08 |
| rs2907674          | 7   | 153471050 | G             | A            | -0.128 | 0.001 | 1.71E-08 |
| rs3747630          | 1   | 204588140 | A             | G            | 0.156  | 0.001 | 4.53E-09 |
| rs3747631          | 1   | 204587569 | C             | G            | 0.163  | 0.001 | 5.01E-09 |
| rs3789044          | 1   | 204589101 | A             | G            | 0.154  | 0.001 | 2.09E-08 |
| rs55678522         | 1   | 204573481 | A             | G            | 0.163  | 0.001 | 5.48E-09 |
| rs55979051         | 1   | 204567041 | G             | A            | 0.156  | 0.001 | 3.33E-08 |
| rs59883612         | 7   | 153484125 | C             | T            | -0.127 | 0.001 | 3.99E-08 |
| rs60009449         | 7   | 153489996 | C             | T            | -0.129 | 0.001 | 3.32E-08 |
| rs61817482         | 1   | 204570347 | A             | G            | 0.157  | 0.001 | 2.63E-08 |

|                                   |    |           |   |   |        |       |          |
|-----------------------------------|----|-----------|---|---|--------|-------|----------|
| rs6958769                         | 7  | 153487814 | T | C | -0.125 | 0.001 | 4.14E-08 |
| rs73488191                        | 7  | 153465730 | G | A | -0.129 | 0.001 | 1.43E-08 |
| <b>Glucosamine</b>                |    |           |   |   |        |       |          |
| rs10740101                        | 10 | 64746142  | G | A | 0.127  | 0.001 | 4.42E-08 |
| rs10840899                        | 12 | 17996887  | A | G | -0.108 | 0.001 | 4.75E-08 |
| rs1509952                         | 10 | 64739668  | T | C | 0.127  | 0.001 | 3.96E-08 |
| rs4746746                         | 10 | 64699981  | T | C | 0.126  | 0.001 | 4.81E-08 |
| rs6479846                         | 10 | 64655471  | C | A | 0.126  | 0.001 | 4.87E-08 |
| rs6479848                         | 10 | 64659101  | C | T | 0.126  | 0.001 | 4.94E-08 |
| rs6479860                         | 10 | 64745865  | T | C | 0.127  | 0.001 | 4.58E-08 |
| rs7100204                         | 10 | 64640543  | C | T | 0.127  | 0.001 | 4.02E-08 |
| rs7100320                         | 10 | 64640594  | C | T | 0.129  | 0.001 | 2.91E-08 |
| rs7665570                         | 4  | 42152351  | A | C | 0.123  | 0.001 | 4.34E-08 |
| <b>Vitamin/mineral supplement</b> |    |           |   |   |        |       |          |
| rs10005662                        | 4  | 42178259  | T | C | -0.042 | 0.004 | 2.84E-06 |
| rs10010204                        | 4  | 42162182  | C | G | -0.042 | 0.004 | 2.31E-06 |
| rs10034294                        | 4  | 42187640  | T | C | -0.051 | 0.005 | 5.80E-07 |
| rs10459544                        | 14 | 74419191  | G | C | -0.045 | 0.005 | 3.72E-06 |
| rs11159045                        | 14 | 74378984  | T | C | -0.045 | 0.005 | 4.85E-06 |
| rs11559994                        | 12 | 40336494  | A | G | -0.034 | 0.004 | 4.50E-06 |
| rs12590001                        | 14 | 74368920  | C | T | -0.045 | 0.005 | 4.80E-06 |
| rs1963798                         | 14 | 74372862  | C | T | -0.045 | 0.005 | 4.79E-06 |
| rs2079632                         | 14 | 74421212  | G | C | -0.046 | 0.005 | 3.03E-06 |
| rs28591364                        | 4  | 42174012  | G | T | -0.042 | 0.004 | 2.73E-06 |
| rs28668005                        | 4  | 42174395  | T | C | -0.042 | 0.004 | 2.99E-06 |
| rs28687702                        | 4  | 42181516  | T | G | -0.042 | 0.004 | 3.00E-06 |
| rs28719870                        | 4  | 42157823  | G | A | -0.052 | 0.005 | 1.51E-07 |
| rs34902783                        | 4  | 42184017  | C | A | -0.042 | 0.004 | 2.84E-06 |
| rs35079923                        | 4  | 42184622  | T | A | -0.042 | 0.004 | 2.98E-06 |
| rs4293573                         | 2  | 161877629 | T | G | 0.032  | 0.003 | 4.62E-06 |
| rs4299622                         | 4  | 42164386  | G | A | -0.042 | 0.004 | 2.55E-06 |
| rs486112                          | 10 | 43243510  | G | A | -0.042 | 0.004 | 4.40E-06 |
| rs4903163                         | 14 | 74451171  | C | T | -0.046 | 0.005 | 3.17E-06 |
| rs493230                          | 10 | 43247120  | A | G | -0.042 | 0.004 | 4.55E-06 |
| rs507485                          | 10 | 43250110  | C | A | -0.059 | 0.005 | 3.04E-07 |
| rs538429                          | 10 | 43251146  | T | C | -0.042 | 0.004 | 4.86E-06 |
| rs56087460                        | 4  | 42171632  | A | G | -0.042 | 0.004 | 2.74E-06 |
| rs618687                          | 10 | 43232419  | G | A | -0.042 | 0.004 | 3.98E-06 |
| rs671429                          | 10 | 43248258  | C | T | -0.042 | 0.004 | 4.28E-06 |
| rs677749                          | 10 | 43243001  | C | A | -0.042 | 0.004 | 3.98E-06 |
| rs6811916                         | 4  | 42183856  | C | T | -0.042 | 0.004 | 2.79E-06 |
| rs6828811                         | 4  | 42161066  | C | T | -0.052 | 0.005 | 1.23E-07 |
| rs6857720                         | 4  | 42158529  | A | T | -0.051 | 0.005 | 2.43E-07 |
| rs7141392                         | 14 | 74428286  | G | A | -0.046 | 0.005 | 3.17E-06 |
| rs71608101                        | 4  | 42168329  | T | C | -0.042 | 0.004 | 2.57E-06 |
| rs71608102                        | 4  | 42168399  | T | G | -0.042 | 0.004 | 2.55E-06 |
| rs71648648                        | 1  | 241472176 | A | G | -0.077 | 0.008 | 2.16E-06 |
| rs7665570                         | 4  | 42152351  | A | C | -0.042 | 0.004 | 4.22E-06 |
| rs7960023                         | 12 | 40329432  | C | A | -0.034 | 0.004 | 3.94E-06 |
| rs8016802                         | 14 | 74462213  | G | A | -0.045 | 0.005 | 4.64E-06 |

SNP = single nucleotide polymorphism; CHR: chromosome; POS: position; SE: standard error.

**Supplemental Table S2. Potential confounders of SNPs for chondroitin intake under the condition of  $P < 5 \times 10^{-8}$  in the PhenoScanner**

| Exposure    | SNP         | Trait                                                                                                                                                                                                                                                                                                                                                    |
|-------------|-------------|----------------------------------------------------------------------------------------------------------------------------------------------------------------------------------------------------------------------------------------------------------------------------------------------------------------------------------------------------------|
| Chondroitin | rs10246938a | Mineral and other dietary supplements: fish oil<br>Average weekly beer plus cider intake                                                                                                                                                                                                                                                                 |
|             | rs10247195a | Mineral and other dietary supplements: fish oil<br>Average weekly beer plus cider intake                                                                                                                                                                                                                                                                 |
|             | rs10268402a | Mineral and other dietary supplements: fish oil<br>Average weekly beer plus cider intake                                                                                                                                                                                                                                                                 |
|             | rs10282264a | Mineral and other dietary supplements: fish oil<br>Average weekly beer plus cider intake                                                                                                                                                                                                                                                                 |
|             | rs11240229b | Qualifications: college or university degree<br>Years of educational attainment<br>Mineral and other dietary supplements: fish oil<br>Years of educational attainment in females                                                                                                                                                                         |
|             | rs11584700b | College completion<br>College completion females<br>Educational attainment<br>Educational attainment females<br>Educational attainment<br>Mineral and other dietary supplements: fish oil<br>Qualifications: college or university degree<br>College completion<br>Years of educational attainment in females<br>Years of educational attainment         |
|             | rs1158857b  | College completion<br>Cognitive ability multi trait analysis<br>Educational attainment years of education<br>Intelligence multi trait analysis<br>Mineral and other dietary supplements: fish oil<br>Qualifications: college or university degree<br>College completion<br>Years of educational attainment in females<br>Years of educational attainment |
|             | rs12040459b | Mineral and other dietary supplements: fish oil<br>Qualifications: college or university degree<br>Years of educational attainment in females<br>Years of educational attainment                                                                                                                                                                         |
|             | rs12040520b | Mineral and other dietary supplements: fish oil<br>Qualifications: college or university degree<br>Years of educational attainment in females<br>Years of educational attainment                                                                                                                                                                         |
|             | rs12044599b | Mineral and other dietary supplements: fish oil<br>Qualifications: college or university degree<br>Years of educational attainment in females<br>Years of educational attainment                                                                                                                                                                         |
|             | rs12046747b | College completion<br>Mineral and other dietary supplements: fish oil<br>Qualifications: college or university degree<br>College completion<br>Years of educational attainment in females                                                                                                                                                                |

|             |  |                                                                                                                                                                                                                              |
|-------------|--|------------------------------------------------------------------------------------------------------------------------------------------------------------------------------------------------------------------------------|
|             |  | Years of educational attainment                                                                                                                                                                                              |
| rs16853666  |  | Mineral and other dietary supplements: fish oil                                                                                                                                                                              |
| rs16854023b |  | College completion<br>Mineral and other dietary supplements: fish oil<br>Qualifications: college or university degree<br>College completion<br>Years of educational attainment in females<br>Years of educational attainment |
| rs2098112a  |  | Mineral and other dietary supplements: fish oil<br>Average weekly beer plus cider intake<br>Crohns disease                                                                                                                   |
| rs2533123a  |  | Mineral and other dietary supplements: fish oil<br>Average weekly beer plus cider intake                                                                                                                                     |
| rs2533125a  |  | Mineral and other dietary supplements: fish oil<br>Average weekly beer plus cider intake                                                                                                                                     |
| rs2533126a  |  | Mineral and other dietary supplements: fish oil<br>Average weekly beer plus cider intake                                                                                                                                     |
| rs2533128a  |  | Mineral and other dietary supplements: fish oil<br>Average weekly beer plus cider intake                                                                                                                                     |
| rs2533145a  |  | Mineral and other dietary supplements: fish oil<br>Average weekly beer plus cider intake                                                                                                                                     |
| rs2533148a  |  | Mineral and other dietary supplements: fish oil<br>Average weekly beer plus cider intake<br>Crohns disease                                                                                                                   |
| rs2533273a  |  | Mineral and other dietary supplements: fish oil<br>Average weekly beer plus cider intake                                                                                                                                     |
| rs2622166a  |  | Mineral and other dietary supplements: fish oil<br>Average weekly beer plus cider intake                                                                                                                                     |
| rs2622170a  |  | Mineral and other dietary supplements: fish oil<br>Average weekly beer plus cider intake                                                                                                                                     |
| rs2622171a  |  | Mineral and other dietary supplements: fish oil<br>Average weekly beer plus cider intake                                                                                                                                     |
| rs2622217a  |  | Mineral and other dietary supplements: fish oil<br>Average weekly beer plus cider intake                                                                                                                                     |
| rs2622225a  |  | Mineral and other dietary supplements: fish oil<br>Average weekly beer plus cider intake                                                                                                                                     |
| rs2622226a  |  | Mineral and other dietary supplements: fish oil<br>Average weekly beer plus cider intake                                                                                                                                     |
| rs2907674a  |  | Mineral and other dietary supplements: fish oil<br>Average weekly beer plus cider intake                                                                                                                                     |
| rs3747630b  |  | College completion<br>Mineral and other dietary supplements: fish oil<br>Qualifications: college or university degree<br>College completion<br>Years of educational attainment                                               |
| rs3789044b  |  | Mineral and other dietary supplements: fish oil<br>Qualifications: college or university degree<br>Years of educational attainment in females<br>Years of educational attainment                                             |
| rs3789044b  |  | College completion<br>Educational attainment<br>Mineral and other dietary supplements: fish oil<br>Qualifications: college or university degree<br>College completion                                                        |

|  |             |                                                                                                                                                                                  |
|--|-------------|----------------------------------------------------------------------------------------------------------------------------------------------------------------------------------|
|  |             | Years of educational attainment in females<br>Years of educational attainment                                                                                                    |
|  | rs55678522b | Mineral and other dietary supplements: fish oil<br>Qualifications: college or university degree<br>Years of educational attainment in females<br>Years of educational attainment |
|  | rs55979051b | Mineral and other dietary supplements: fish oil<br>Qualifications: college or university degree<br>Years of educational attainment in females<br>Years of educational attainment |
|  | rs61817482b | Mineral and other dietary supplements: fish oil<br>Qualifications: college or university degree<br>Years of educational attainment in females<br>Years of educational attainment |
|  | rs6958769a  | Mineral and other dietary supplements: fish oil<br>Average weekly beer plus cider intake                                                                                         |
|  | rs73488191a | Mineral and other dietary supplements: fish oil<br>Average weekly beer plus cider intake                                                                                         |

<sup>a</sup> SNPs are associated with potential confounders “beer plus cider intake”, while <sup>b</sup> SNPs are associated with potential confounders “high educational status”

**Supplemental Table S3. Pleiotropy-robust MR results for dietary supplement intake and kidney function**

| Exposure                          | Analysis   | <sup>a</sup> Outcome                   | MR-Egger intercept P | MR methods     | eGFR change beta (%) | Standard error (%) | P value |
|-----------------------------------|------------|----------------------------------------|----------------------|----------------|----------------------|--------------------|---------|
| Chondroitin                       | Main       | Creatinine-based log-eGFR (CKDGen)     | 0.013                | MR-Egger       | -0.012               | 0.004              | 0.007   |
|                                   |            |                                        |                      | Weighed median | -0.001               | 0.001              | 0.255   |
|                                   | Validation | Creatinine-based log-eGFR (CKDGen+UKB) | 0.2                  | MR-Egger       | -0.572               | 0.297              | 0.026   |
|                                   |            |                                        |                      | Weighed median | -0.159               | 0.044              | 3E-04   |
| Glucosamine                       | Main       | Creatinine-based log-eGFR (CKDGen)     | 0.419                | MR-Egger       | -0.277               | 0.741              | 0.357   |
|                                   |            |                                        |                      | Weighed median | -0.182               | 0.121              | 0.132   |
|                                   | Validation | Creatinine-based log-eGFR (CKDGen+UKB) | 0.02                 | MR-Egger       | 1.682                | 0.434              | 0       |
|                                   |            |                                        |                      | Weighed median | 0.551                | 0.098              | 1E-08   |
| Vitamin/mineral supplement intake | Main       | Creatinine-based log-eGFR (CKDGen)     | 0.077                | MR-Egger       | 2.129                | 1.256              | 0.036   |
|                                   |            |                                        |                      | Weighed median | 1.239                | 0.262              | 2E-06   |
|                                   | Validation | Creatinine-based log-eGFR (CKDGen+UKB) | 0.612                | MR-Egger       | 0.201                | 1.001              | 0.416   |
|                                   |            |                                        |                      | Weighed median | 1.429                | 0.217              | 4E-11   |

MR = Mendelian randomization; eGFR = estimated glomerular filtration rate

<sup>a</sup>For main and validation datasets, meta-analysis of creatinine-based log-eGFR from CKDGen and meta-analysis of creatinine-based log-eGFR from the CKDGen and UKB were used as outcome summary statistics, respectively.<sup>1, 2</sup>

The MR estimates were converted into the degree of change (percentage [standard error]) of log-transformed eGFR to facilitate interpretation.

**Supplemental Table S4. Sensitivity analyses of chondroitin intake and kidney function after exclusion of SNPs associated with potential confounders identified in PhenoScanner**

| <sup>a</sup> Outcome                                                           | MR methods | eGFR change beta (%) | Standard error (%) | P value |
|--------------------------------------------------------------------------------|------------|----------------------|--------------------|---------|
| Exclusion of SNPs associated with beer plus cider intake ( <sup>a</sup> SNPs)  |            |                      |                    |         |
| Creatinine-based log-eGFR (CKDGen)                                             | MR-IVW     | -0.247               | 0.040              | 7E-10   |
| Creatinine-based log-eGFR (CKDGen+UKB)                                         | MR-IVW     | -0.217               | 0.026              | 3E-17   |
| Exclusion of SNPs associated with high educational status ( <sup>b</sup> SNPs) |            |                      |                    |         |
| Creatinine-based log-eGFR (CKDGen)                                             | MR-IVW     | 1E-05                | 0.026              | 0.976   |
| Creatinine-based log-eGFR (CKDGen+UKB)                                         | MR-IVW     | -0.135               | 0.011              | 9E-36   |

SNP = single nucleotide polymorphism; MR = Mendelian randomization; eGFR = estimated glomerular filtration rate; MR-IVW = multiplicative random-effects inverse variance-weighted

<sup>a</sup> SNPs are associated with potential confounders “beer plus cider intake”, while <sup>b</sup> SNPs are associated with potential confounders “high educational status”

<sup>a</sup> Sensitivity analyses were performed with both main and validation datasets, which include meta-analysis of creatinine-based log-eGFR from CKDGen and meta-analysis of creatinine-based log-eGFR from the CKDGen and UKB.<sup>1, 2</sup>



## Supplemental References

1. Stanzick KJ, Li Y, Schlosser P, *et al.* Discovery and prioritization of variants and genes for kidney function in >1.2 million individuals. *Nat Commun* 2021; **12**: 4350.
2. Wuttke M, Li Y, Li M, *et al.* A catalog of genetic loci associated with kidney function from analyses of a million individuals. *Nat Genet* 2019; **51**: 957-972.
